# Supplementary material for: Enhancing dendrobine production in Dendrobium nobile through mono-culturing of endophytic fungi, Trichoderma longibrachiatum (MD33) in a temporary immersion bioreactor system
Source: Front Plant Sci. 2024 Jan 29;15:1302817. doi: 10.3389/fpls.2024.1302817 (PMC10859523; doi:10.3389/fpls.2024.1302817)
Supplement: Supplementary file 2 [file Table_1.xlsx]

## Sheet: Sheet1
		Quantitative Raw Data
	S. No.	Test Group		Intensity	Calculated Concentration	unit	Fold Increased*	Fold Increased#
	1	CGTB	Control Group	2045782831	685.955	ng/mL
	2	EGTB	Experimental group	5355622857	1804.23	ng/mL	2.63024
	3	CGTIBS	Control Group	1359280548	454.011	ng/mL
	4	EGTIBS	Experimental group	13085216134	4415.77	ng/mL	9.72613	3.69781
	S. No.	Standard Dendrobine Lineraity	Concentration	Intensity
	1	Dendrobine	20	73713080		ng/mL
	2	Dendrobine	40	136012406		ng/mL
	3	Dendrobine	60	190957037		ng/mL
	4	Dendrobine	80	254457310		ng/mL
	5	Dendrobine	100	310333173		ng/mL
				R2	0.999
		Fold Increased*=	2.6	as compared to CGTB
		Fold Increased**=	9.7	as compared to CGTIBS
		Fold Increased#=	3.7	as compared to EGTB
